# Supplementary material for: Changes in Soft-Tissue Sarcoma Treatment Patterns over Time: A Population-Based Study in a Country with Universal and Centralized Healthcare
Source: Hindawi journal article supplement (doi:10.1155/2019/8409406), 2019-09-16
Supplement: f1 [file 8409406.f1.pdf]

## Supplementary Material

### Summary of codes used

| <b>Variable</b>                                                                                                             | <b>ICD10 Code</b>                                                                                                                                                                                                                                                                                      | <b>N unique</b> |
|-----------------------------------------------------------------------------------------------------------------------------|--------------------------------------------------------------------------------------------------------------------------------------------------------------------------------------------------------------------------------------------------------------------------------------------------------|-----------------|
| Chemotherapy<br><br>-Presence of these codes in the OHIP, as well as matching patient IDs in the ALR-Chemo database         | G281<br>G339<br>G359<br>G381<br>G382<br>G388<br>Z511<br>Z512                                                                                                                                                                                                                                           | 3905            |
| Surgery<br><br>- Presence of these codes in the OHIP database, within 1 year of biopsy confirmed sarcoma diagnosis          | Surgical codes: R037, R214, R216, R226, R246, R253, R266, R272, R293, R294, R295, R297, R330, R523, R591, R592, R641<br><br>Amputation codes: R614, R616, R620, R630, R631<br>Tumor excision codes: Z632, Z633, Z634<br>Retroperitoneal tumor: S431<br>Radical Soft Tissue Tumour Excision: N554, N553 | 5294            |
| Radiotherapy<br><br>-Presence of these codes in the OHIP database, as well as matching patient IDs in the ALR-Rads database | X310<br>X311<br>X312<br>X313                                                                                                                                                                                                                                                                           | 4289            |
